# Supplementary material
Source: MDPI journal article supplement (https://www.mdpi.com/2504-5377/6/4/74)
Supplement: s1 [file s1]

Archive with 1 entries (1 files):
- colloids-1920703-supplementary.pdf
